# Supplementary material
Source: publisher site journal article supplement (https://www.dovepress.com/article/399928)
Supplement: Supplementary file 1 [file get_supplementary_file.php]

**baPWV**

**（Y）**

Path A

Path B

Path C

**VFA**

**(X)**

**DBP**

**(M)**

|  | Model 5 |
| --- | --- |
| Total effect | 5.90(2.23-9.57) |
| Direct effect (Path A) | 5.40(1.80-9.01) |
| Indirect effect (Path BC) | 0.50(-0.41-2.14) |
| Percent mediation (%) | - |

Supplemental Fig 1. Mediation effect of DBP in the association between Visceral fat area and Brachial-ankle pulse wave velocity

Abbreviations: VFA visceral fat area, baPWV brachial-ankle pulse wave velocity, DBP diastolic blood pressure, PP pulse pressure.
